# Supplementary material
Source: HighWire-hosted journal article supplement (https://www.annfammed.org/highwire/filestream/7371/field_highwire_adjunct_files/1/McMullin_suppl_Fig_2.pdf)
Supplement: McMullin_suppl_Fig_2.pdf [file McMullin_suppl_Fig_2.pdf]

Online Supplementary Material

McMullin ST, Lonergan TP, Rynearson CS, Doerr TD, Veregge PA, Scanlan ES. Impact of an evidence-based computerized decision support system on primary care prescription costs. *Ann Fam Med*. 2004;2:494-498.

<http://www.annfammed.org/cgi/content/full/2/5/494/DC1>

**Figure 2. Example message-of-the-day screen.**

[Refresh](#) [Pt Search](#) [Logoff](#) [My Options](#) [Dispense](#) [Help](#) [Tomorrow](#) [EB Info](#) [PT Info](#)

**Narrow-spectrum antibiotics such as AMOXICILLIN, DOXYCYCLINE, or SEPTRA (each < \$10) are preferred over ZITHROMAX (\$44) when antibiotics are required for sinusitis.**

According to recent guidelines from the American College of Physicians-American Society of Internal Medicine, narrow-spectrum antibiotics are preferred for the initial treatment of severe or persistent moderate sinusitis in adults. Results from four head-to-head comparisons suggest Zithromax (azithromycin) has no significant advantage over narrow-spectrum agents in the treatment of sinusitis. Overall, clinical cure was reported in 74-83% of patients treated with Zithromax and 73-87% of patients treated with narrow-spectrum agents. Nearly 100% of patients in each group experienced bacterial cure and/or clinical improvement.

Pt = patient; EB Info = therapeutic reviews; PT Info = patient education materials.
